# Supplementary material
Source: Springer Nature journal article supplement (https://www.springermedizin.de/resource/supplementary/12885_2010_2414_MOESM1_ESM.pdf/9461234)
Supplement: MOESM1 [file 9461234]

Total 40 patients:  
Screen patients for inclusion and exclusion criteria, obtain informed consent. Collect trial relevant data and patient history.

Study Treatment

Carbon  
Ion Boost

Perform Treatment Planning  
Application of Study Treatment

Clinical assessment and Neuroimaging, 4-6 weeks after completion of Radiation Therapy

Clinical assessment and Neuroimaging, every 3 months after Radiation Therapy

Final Study Visit for LPI: 3 years after Study Treatment  
All other patients will be followed until 3 years after LPI or until death

regular follow-up visits every 3 months or in a shorter interval if clinically necessary
